# Supplementary material for: Dietary Patterns during Pregnancy Are Associated with the Risk of Gestational Diabetes Mellitus: Evidence from a Chinese Prospective Birth Cohort Study
Source: PubMed Central journal article supplement (PMC6412704; doi:10.3390/nu11020405), 2019-02-15
Supplement: nutrients-11-00405-s001.pdf [file nutrients-11-00405-s001.pdf]

---

**Table S1.** Complete list of the 21 food groups.

---

| <b>Food group</b>          | <b>Food items</b>                                                                                                                                                   |
|----------------------------|---------------------------------------------------------------------------------------------------------------------------------------------------------------------|
| Rice                       | Rice, rice flour                                                                                                                                                    |
| Wheat flour and products   | Noodle, bread, bun, flour, steamed twisted roll                                                                                                                     |
| Whole grains               | Brown rice, millet, sorghum, black rice                                                                                                                             |
| Tubers                     | Potatoes, sweet potatoes,                                                                                                                                           |
| Red meat                   | Pork, pork ribs, pork fat, beef, lamb, donkey, rabbit                                                                                                               |
| Poultry                    | Chicken, duck, goose                                                                                                                                                |
| Organ meats                | Liver, kidney, blood, large intestine                                                                                                                               |
| Freshwater fish            | Carp, squid, grass carp, chub, catfish                                                                                                                              |
| Marine fish                | Hair tail, yellow croaker, squid, herring, striped bass                                                                                                             |
| Shrimps, crabs and mussels | Shrimp, crab, scallop, oyster                                                                                                                                       |
| Seaweed                    | Fresh or dried seaweed                                                                                                                                              |
| Milk                       | Cow milk, goat milk                                                                                                                                                 |
| Dairy products             | Yogurt, cheese                                                                                                                                                      |
| Eggs                       | Egg, duck egg, goose egg                                                                                                                                            |
| Beans and bean products    | Broad bean, soy, tofu, dried tofu, soy milk                                                                                                                         |
| Fruits                     | Apple, pear, orange, banana, grape, peach, watermelon, cherry, jujube                                                                                               |
| Vegetables                 | Spinach, cabbage, Chinese cabbage, celery, rape, oil wheat, western lettuce, chives, tomato, cucumber, carrot, winter melon, onion, green paper, broccoli, mushroom |
| Nuts                       | Peanut, walnut, sesame, cashew, almond, sunflower seed, pistachio                                                                                                   |
| Pastry and candy           | Jelly, jam, chocolate, honey, sugar, candy, mooncake                                                                                                                |
| Fried foods                | Chips, French fries, fritters                                                                                                                                       |
| Sweet Beverages            | Carbonated drinks, sweet tea, soft drinks, fruit juice                                                                                                              |

---

**Table S2.** Associations of intake of foods and food groups (expressed as z-scores) from food frequency questionnaires (FFQ) with risk for GDM and difference in mean plasma glucose level during oral glucose tolerance testing (OGTT)

| Foods from FFQ             | GDM, OR (95% CI)     | Plasma glucose level, $\beta$ (95% CI) |                        |                         |
|----------------------------|----------------------|----------------------------------------|------------------------|-------------------------|
|                            | Reference= Non-GDM   | Fasting                                | 1 hour after OGTT      | 2 hours after OGTT      |
| Rice                       | 0.76 (0.65, 0.89) ** | -0.03 (-0.07, 0.00) *                  | -0.13 (-0.23, -0.02) * | -0.07 (-0.15, 0.01)     |
| Wheat flour and products   | 1.02 (0.88, 1.19)    | 0.01 (-0.03, 0.04)                     | 0.01 (-0.09, 0.11)     | 0.03 (-0.05, 0.11)      |
| Whole grain                | 1.02 (0.88, 1.18)    | -0.01 (-0.04, 0.03)                    | 0.11 (0.01, 0.22) *    | 0.12 (0.04, 0.20) **    |
| Tubers                     | 0.88 (0.74, 1.03)    | -0.01 (-0.05, 0.02)                    | -0.05 (-0.16, 0.05)    | -0.01 (-0.09, 0.07)     |
| Red meat                   | 0.94 (0.80, 1.10)    | 0.01 (-0.02, 0.04)                     | -0.02 (-0.12, 0.08)    | -0.02 (-0.10, 0.06)     |
| Poultry                    | 0.92 (0.78, 1.09)    | -0.01 (-0.04, 0.02)                    | -0.05 (-0.15, 0.05)    | -0.04 (-0.12, 0.04)     |
| Organ meats                | 0.95 (0.81, 1.12)    | -0.02 (-0.05, 0.01)                    | 0.05 (-0.05, 0.16)     | 0.01 (-0.07, 0.09)      |
| Freshwater fish            | 1.04 (0.89, 1.20)    | 0.01 (-0.03, 0.04)                     | 0.08 (-0.02, 0.19)     | 0.03 (-0.05, 0.11)      |
| Marine fish                | 1.05 (0.91, 1.21)    | 0.00 (-0.04, 0.03)                     | 0.05 (-0.05, 0.16)     | 0.06 (-0.02, 0.14)      |
| Shrimps, crabs and mussels | 1.10 (0.95, 1.26)    | 0.00 (-0.04, 0.03)                     | 0.09 (-0.02, 0.19)     | 0.05 (-0.03, 0.13)      |
| Seaweed                    | 1.03 (0.89, 1.19)    | -0.01 (-0.04, 0.02)                    | 0.00 (-0.10, 0.10)     | 0.02 (-0.05, 0.10)      |
| Milk                       | 1.05 (0.91, 1.22)    | 0.02 (-0.02, 0.05)                     | 0.03 (-0.07, 0.14)     | -0.01 (-0.09, 0.07)     |
| Dairy products             | 1.10 (0.95, 1.28)    | 0.04 (0.00, 0.07) *                    | 0.05 (-0.04, 0.16)     | 0.09 (0.01, 0.17) *     |
| Eggs                       | 0.96 (0.82, 1.13)    | -0.01 (-0.04, 0.03)                    | 0.04 (-0.06, 0.15)     | 0.05 (-0.03, 0.13)      |
| Beans and products         | 0.86 (0.72, 1.02)    | 0.00 (-0.03, 0.03)                     | 0.00 (-0.10, 0.11)     | 0.00 (-0.09, 0.08)      |
| Fruits                     | 0.77 (0.65, 0.90) ** | -0.06 (-0.09, -0.02) **                | -0.10 (-0.21, 0.01)    | -0.12 (-0.21, -0.04) ** |
| Vegetables                 | 0.85 (0.73, 1.00) *  | -0.04 (-0.07, -0.01) *                 | -0.07 (-0.18, 0.03)    | -0.07 (-0.15, 0.01)     |
| Nuts                       | 1.05 (0.90, 1.21)    | 0.01 (-0.02, 0.04)                     | 0.03 (-0.07, 0.14)     | 0.03 (-0.05, 0.11)      |
| Pastry and candy           | 0.96 (0.82, 1.12)    | 0.02 (-0.02, 0.05)                     | -0.01 (-0.12, 0.09)    | -0.04 (-0.12, 0.04)     |
| Fried foods                | 0.82 (0.65, 1.04)    | 0.02 (-0.01, 0.05)                     | -0.02 (-0.13, 0.08)    | -0.06 (-0.14, 0.02)     |
| Sweet Beverages            | 1.00 (0.87, 1.16)    | 0.03 (-0.01, 0.06)                     | -0.04 (-0.14, 0.07)    | 0.00 (-0.08, 0.08)      |

Adjusted for all other food items, pre-pregnancy BMI, pre-pregnancy BMI square, age, parity, family income, education level, ethnicity, smoking status, total energy intake, physical activity. OGTT, oral glucose tolerance test. GDM, gestational diabetes mellitus. \*\*\*: p<0.001; \*\*p<0.01; \*p<0.05.
